# Supplementary material
Source: PubMed Central journal article supplement (PMC6193879)
Supplement: BPH-175-4209-s001.pdf [file BPH-175-4209-s001.pdf]

**Table S1.** Tissue specimen information

| Number | Gender | Age | Subtype    | TNM stage | Location |
|--------|--------|-----|------------|-----------|----------|
| 1      | male   | 36  | protruded  | T4N0M0    | rectum   |
| 2      | male   | 73  | others     | T3N0M0    | others   |
| 3      | male   | 64  | ulcerative | T4N2M0    | rectum   |
| 4      | female | 56  | protruded  | T4N1M0    | rectum   |
| 5      | male   | 52  | discoid    | T4N1M0    | rectum   |
| 6      | male   | 53  | ulcerative | T3N0M0    | rectum   |
| 7      | male   | 78  | ulcerative | T3N0M0    | rectum   |
| 8      | male   | 60  | others     | TisNOMO   | rectum   |
| 9      | male   | 52  | ulcerative | T4N2M0    | rectum   |
| 10     | male   | 57  | ulcerative | T3N2M1    | colon    |
| 11     | female | 66  | discoid    | T2N0M0    | rectum   |
| 12     | male   | 47  | ulcerative | T4N1M0    | colon    |
| 13     | male   | 66  | discoid    | T4N0M0    | rectum   |
| 14     | female | 52  | protruded  | T3N0M0    | colon    |
| 15     | male   | 60  | discoid    | T4N0M0    | rectum   |
| 16     | male   | 64  | protruded  | T4N1M0    | colon    |
| 17     | male   | 69  | protruded  | T3N1M0    | colon    |
| 18     | female | 61  | protruded  | T4N1M0    | rectum   |
| 19     | male   | 64  | discoid    | T4N1M0    | others   |
| 20     | female | 79  | ulcerative | T4N1M0    | rectum   |
| 21     | female | 62  | discoid    | T2N0M0    | rectum   |
| 22     | female | 61  | discoid    | T4N1M0    | rectum   |
| 23     | male   | 44  | protruded  | T3N0M0    | colon    |
| 24     | female | 68  | discoid    | T4N2M1    | rectum   |
| 25     | male   | 60  | discoid    | T4N0M0    | rectum   |
| 26     | female | 51  | protruded  | T4N2M0    | rectum   |
| 27     | female | 45  | ulcerative | T4N1M0    | colon    |
| 28     | female | 44  | protruded  | T2N0M0    | rectum   |
| 29     | female | 72  | discoid    | T2N0M0    | rectum   |
| 30     | female | 52  | ulcerative | T4N0M0    | others   |
| 31     | male   | 45  | ulcerative | T4N2M0    | rectum   |
| 32     | female | 53  | discoid    | T3N1M1    | rectum   |
| 33     | female | 80  | discoid    | T4N0M0    | colon    |
| 34     | male   | 45  | discoid    | T4N0M0    | colon    |
| 35     | male   | 81  | protruded  | T2N1M0    | rectum   |
| 36     | male   | 52  | discoid    | T4N0M0    | colon    |
| 37     | female | 73  | discoid    | T4N0M0    | colon    |
| 38     | male   | 63  | discoid    | T4N0M1    | colon    |
| 39     | female | 63  | ulcerative | T4N2M1    | rectum   |
| 40     | male   | 60  | ulcerative | T4N1M0    | rectum   |

|    |        |    |            |        |        |
|----|--------|----|------------|--------|--------|
| 41 | male   | 58 | ulcerative | T2N2M0 | others |
| 42 | male   | 58 | protruded  | T2N1M0 | rectum |
| 43 | female | 53 | ulcerative | T4N2M1 | rectum |
| 44 | male   | 69 | protruded  | T3N0M0 | colon  |

**Table S2.** Primers used in this study

| Application | Primer         | 5'-3'                   |
|-------------|----------------|-------------------------|
| RT-qPCR     | <i>PPIB</i>    | TGTGGTGTTTGGCAAAGTTC    |
|             |                | GTTTATCCCGGCTGTCTGTC    |
|             | <i>CNT2</i>    | AAGTAGAGCCTGAGGGAAGCAA  |
|             |                | GCCCAGTCCATCCCC         |
|             | <i>CNT3</i>    | GAGCTGTGCAAAGCAGGGA     |
|             |                | TGGCGAATCCTGCTCAACTGTG  |
|             | <i>OCTN1</i>   | TGCTGCTGCCACTGTTTGCT    |
|             |                | TTCAGGAATGAACCACCACA    |
|             | <i>MRP1</i>    | TCTGGTCAGCCCAACTCTCT    |
|             |                | TCCTCCTCTCCAGCTGAATTA   |
|             | <i>MRP2</i>    | TGTGCTCTCCTCCAGACTT     |
|             |                | CTGCTTCTGACCCCCACTAA    |
|             | <i>MDR1</i>    | AGCTGCTGTCTGGGCAA       |
|             |                | TGCCAAGACCTCTTCAGCTAC   |
|             | <i>MCT1</i>    | CACCGTACAGCAACTATACG    |
|             |                | CAATGGTCGCCTCTTGTA      |
|             | <i>MATE2K</i>  | TGGGGCATATTTTACCAATG    |
|             |                | GAACTCCGCCATAGACACAAC   |
|             | <i>OATP1B1</i> | GAATGCCCAAGAGATGATGCTT  |
|             |                | AACCCAGTGCAAGTGATTTCAAT |
|             | <i>OATP2B1</i> | GAGTTTCACCCATTCCACGTACA |
|             |                | GCCACAGGACTCCATGCCT     |
|             | <i>OCT1</i>    | TAATGGACCACATCGCTCAA    |
|             |                | AGCCCCTGATAGAGCACAGA    |
|             | <i>BCRP</i>    | TCTGGC ATTTGTTTCCTC     |
|             |                | CTCCTGGCCCTCTACTCT      |
|             | <i>ENT1</i>    | GCAAAGGAGAGGAGCCAAGA    |
|             |                | TTCATTGGTGGGCTGAGAGTT   |
|             | <i>ENT2</i>    | CCCTGGATCTTGACCTGGAG    |
|             |                | GGTTTTCCCTGGCTTCTGGG    |
|             | <i>OAT10</i>   | TGTGTA CTCTGCCGAGCTTTT  |
|             |                | CACAAGTGGTGTGAGGATGC    |
|             | <i>PEPT1</i>   | TCCACCGCCATCTACCATAC    |
|             |                | GGACAAACACAATCAGGGCT    |

|                |                       |                              |
|----------------|-----------------------|------------------------------|
|                | <i>HDAC1</i>          | ACGAAGACGACCCTGACAAG         |
|                |                       | TCCTCACAGGCAATTCGTTT         |
|                | <i>HDAC2</i>          | ATAAAGCCACTGCCGAAGAA         |
|                |                       | TCCTCCAGCCCAATTAACAG         |
|                | <i>HDAC3</i>          | ACGTGGGCAACTTCCACTAC         |
|                |                       | GACTCTTGGTGAAGCCTTGC         |
|                | <i>HDAC4</i>          | AAGAACAAGGAGAAGGGCAAG        |
|                |                       | TGGAGAACTCTGGTCAAGGGA        |
|                | <i>HDAC5</i>          | ATGTCAGGTCGGGAACCATC         |
|                |                       | GGAAGTGGGCATGGCTCTT          |
|                | <i>HDAC6</i>          | AGTCTTATGGATGGCTATTGCATG     |
|                |                       | TGGACCAGTTAGAGGCCTTCAGG      |
|                | <i>HDAC7</i>          | CCATGACGACGGCAACTTCTT        |
|                |                       | TGCTGCGTCATGTATCCAAAAC       |
|                | <i>HDAC8</i>          | AAGAGGGCGATGATGATC           |
|                |                       | GTGGCTGGGCAGTCATAACC         |
|                | <i>HDAC9</i>          | AGTGTGAGACGCAGACGCTTAG       |
|                |                       | TTTGCTGTGCATTTGTTCTTT        |
|                | <i>HDAC10</i>         | TTACTTCTCCTGGCACCGCTA        |
|                |                       | CCACGTAGTCAGCGTTTCCC         |
| <i>OATPIA2</i> | AATTTGAGTAATAGCACACGA |                              |
|                | AATTTGAGTAATAGCACACGA |                              |
| <i>GAPDH</i>   | AGGTGAAGGTCGGAGTCA    |                              |
|                | GGTCATTGATGGCAACAA    |                              |
| ChIP-qPCR      | <i>CNT2-CH1</i>       | ACATACCAAATAATCTAAGCCAGAATC  |
|                |                       | CACCACAATATTATTAGGCAATCAA    |
|                | <i>CNT2-CH2</i>       | CACCTCCAGAGGCTCAAGG          |
|                |                       | CACACGACTGTGGTTCCAGT         |
|                | <i>CNT2-CH3</i>       | TCCTCACTGATCTGTTTCGTTTTT     |
|                |                       | CGTTTTCCGTGTGAGGACAT         |
| BSP            | <i>CNT2</i>           | ATGTTTATAGGAATGTATTTGTTAGAAG |
|                |                       | ACAAACCTAAAACCTTATACAAAATAAC |

**Table S3.** upB formulation (pH 7.2-pH 7.4)

| Ingredients                           | Amount |
|---------------------------------------|--------|
| NaCl                                  | 7.3 g  |
| D-Glucose                             | 1.1 g  |
| KCl                                   | 0.36 g |
| MgSO <sub>4</sub> · 7H <sub>2</sub> O | 0.3 g  |
| KH <sub>2</sub> PO <sub>4</sub>       | 0.16 g |
| CaCl <sub>2</sub>                     | 0.13 g |

|       |           |
|-------|-----------|
| HEPES | 6 g       |
| ddH2O | Up to 1 L |

**Table S4.** siRNA used in this study

| Name         | 5'-3'               |
|--------------|---------------------|
| HDAC1-siRNA  | CCGGUCAUGUCCAAAGUAA |
| HDAC2-siRNA  | CUACGACGGUGAUAUUGGA |
| HDAC3-siRNA  | AAAGCGAUGUGGAGAUUUA |
| HDAC4-siRNA  | GCAAGAUCUCAUCGUGGA  |
| HDAC5-siRNA  | ACACGUUCAUGCUAAAGCA |
| HDAC6-siRNA  | CCGUGAGAGUCCAACUUU  |
| HDAC7-siRNA1 | UCACUGACCUCGCCUCAA  |
| HDAC7-siRNA2 | GCACGUGAUGUACAUGCAA |
| HDAC8-siRNA  | GGACGGUACUACAGUGUAA |
| HDAC9-siRNA  | GAAAGACACUCCAACUAAU |
| HDAC10-siRNA | GGUGAACAGUGGUAUAGCA |
| NC           | UUCUCCGAACGUGUCACGU |

**Disease Summary for SLC28A2**

| Analysis Type by Cancer     | Cancer vs. Normal |
|-----------------------------|-------------------|
| Bladder Cancer              |                   |
| Brain and CNS Cancer        |                   |
| Breast Cancer               |                   |
| Cervical Cancer             |                   |
| Colorectal Cancer           | 5                 |
| Esophageal Cancer           | 1                 |
| Gastric Cancer              | 2                 |
| Head and Neck Cancer        |                   |
| Kidney Cancer               | 1                 |
| Leukemia                    |                   |
| Liver Cancer                |                   |
| Lung Cancer                 |                   |
| Lymphoma                    |                   |
| Melanoma                    |                   |
| Myeloma                     |                   |
| Other Cancer                |                   |
| Ovarian Cancer              |                   |
| Pancreatic Cancer           |                   |
| Prostate Cancer             |                   |
| Sarcoma                     | 1                 |
| Significant Unique Analyses | 1                 |
| Total Unique Analyses       | 9                 |
|                             | 369               |

**Figure S1**

Summary of *CNT2* expression in various human cancers compared with normal tissues in OncoPrint™. Blue: downregulated in cancer; red: upregulated in cancer.

mRNA expression  
relative to *PP1B*

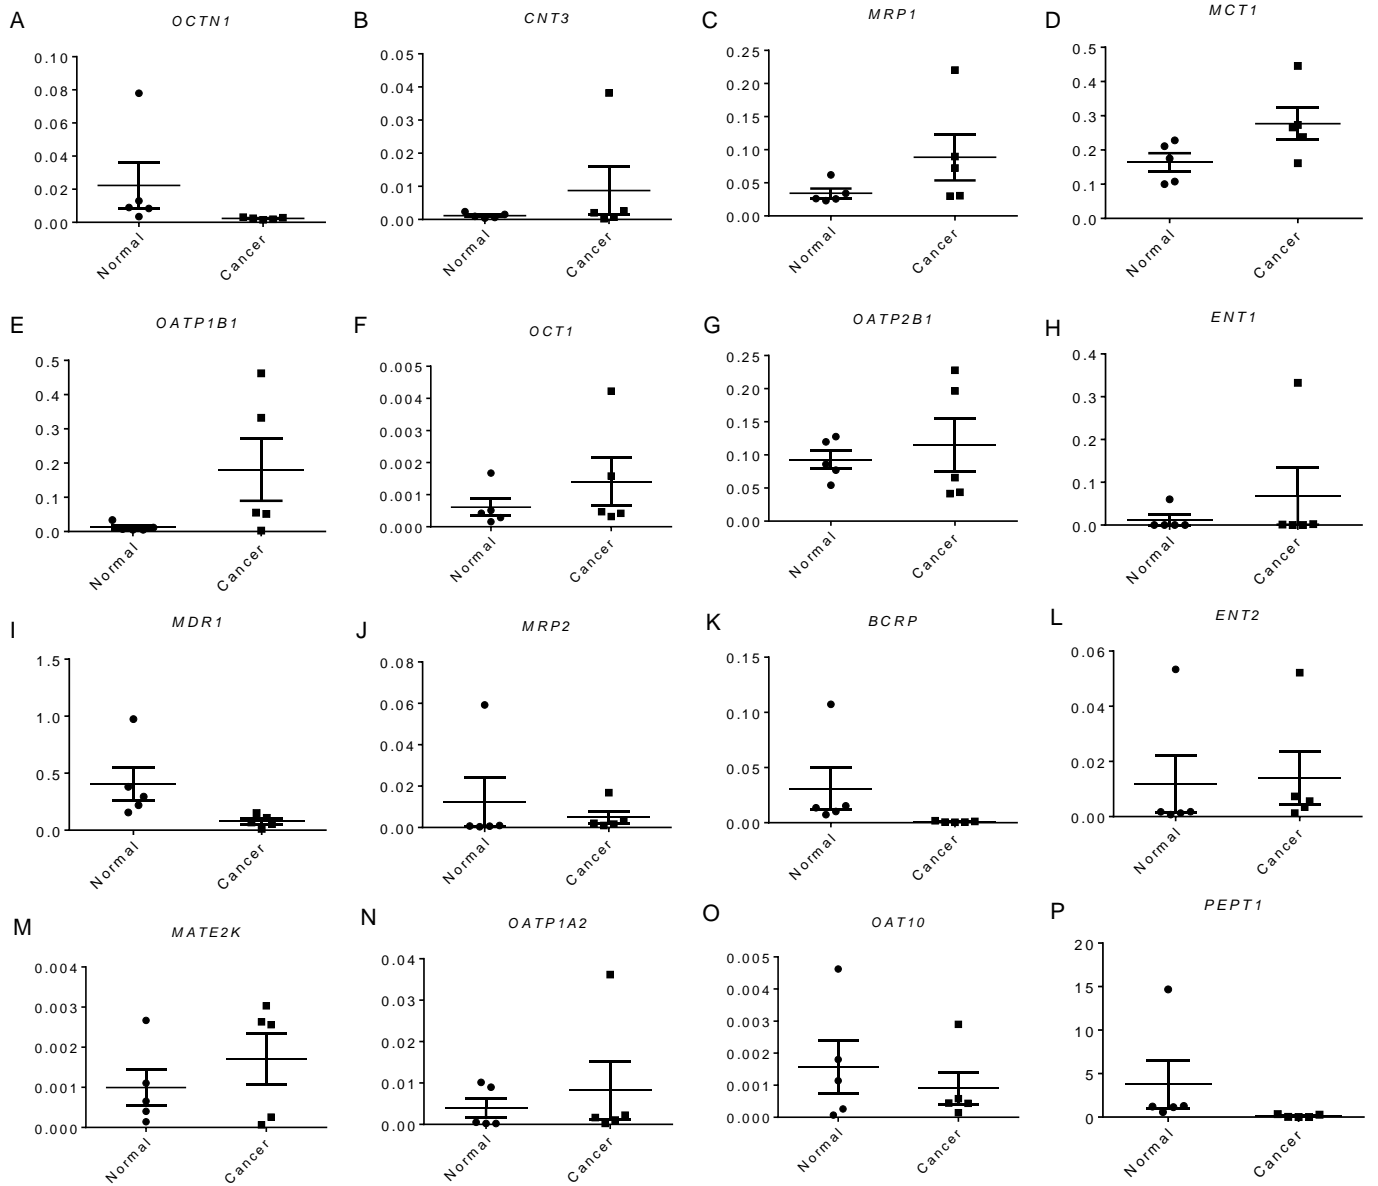

**Figure S2**

RT-qPCR analysis of transporters in matched CRC tissues and adjacent normal tissues normalized to reference gene *PP1B*. Results are expressed as mean  $\pm$  SEM. Two-tailed paired *t* test was used for the analysis. (A) mRNA expression of *OCTN1* in CRC (n=5). (B) mRNA expression of *CNT3* in CRC (n=5). (C) mRNA expression of *MRP1* in CRC (n=5). (D) mRNA expression of *MCT1* in CRC (n=5). (E) mRNA expression of *OATP1B1* in CRC (n=5). (F) mRNA expression of *OCT1* in CRC (n=5). (G) mRNA expression of *OATP2B1* in CRC (n=5). (H) mRNA expression of *ENT1* in CRC (n=5). (I) mRNA expression of *MDR1* in CRC (n=5). (J) mRNA expression of *MRP2* in CRC (n=5). (K) mRNA expression of *BCRP* in CRC (n=5). (L) mRNA expression of *ENT2* in CRC (n=5). (M) mRNA expression of *MATE2K* in CRC (n=5). (N) mRNA expression of *OATP1A2* in CRC (n=5). (O) mRNA expression of *OAT10* in CRC (n=5). (P) mRNA expression of *PEPT1* in CRC (n=5).

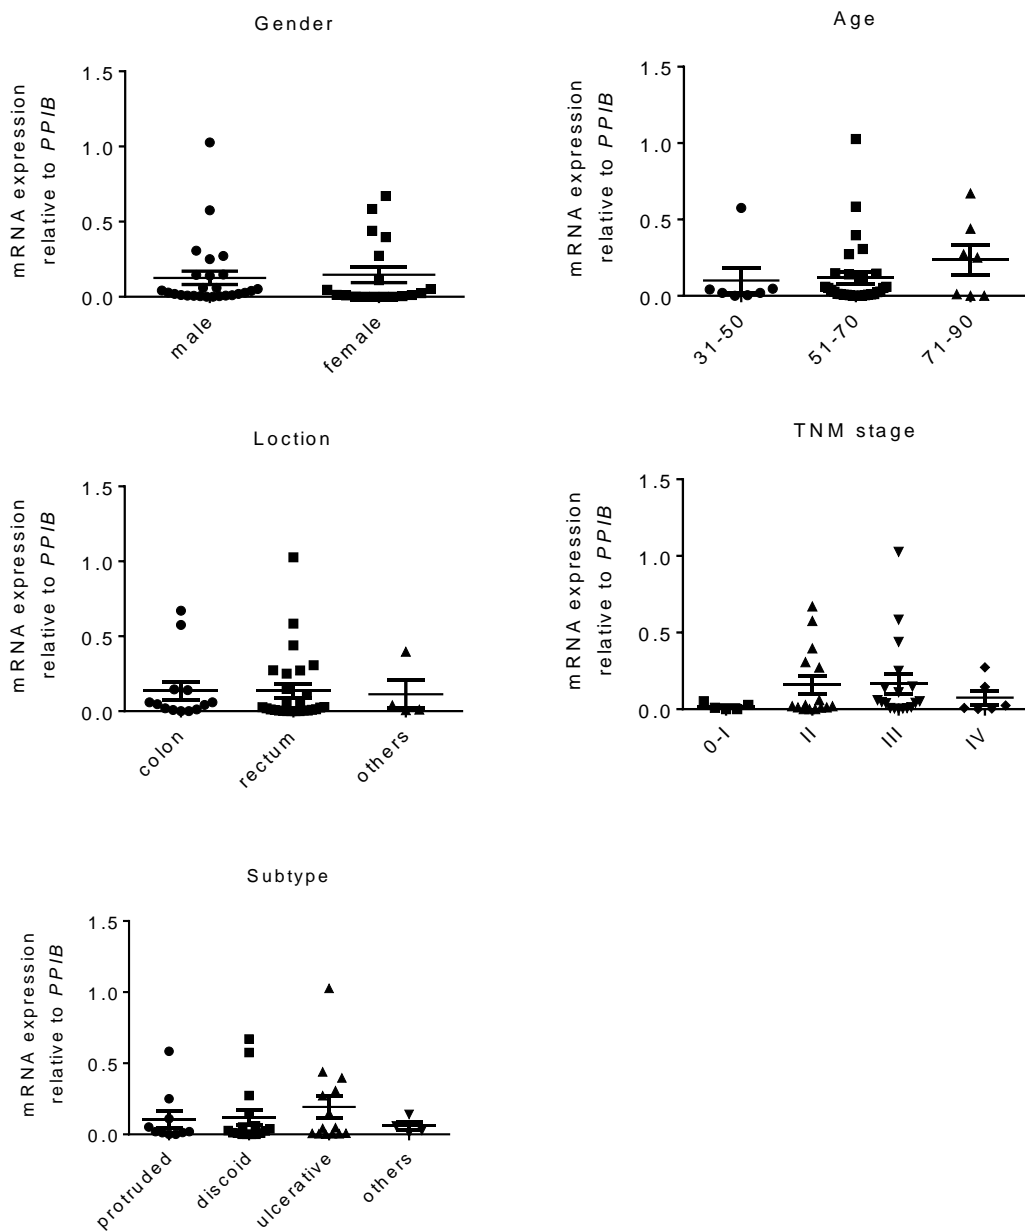

**Figure S3**

Relationship between CNT2 gene expression changes and gender/ age/ location/ TNM stage/ subtype in matched CRC tissues and adjacent normal tissues (n=44). Two-tailed paired *t* test was used for the analysis.

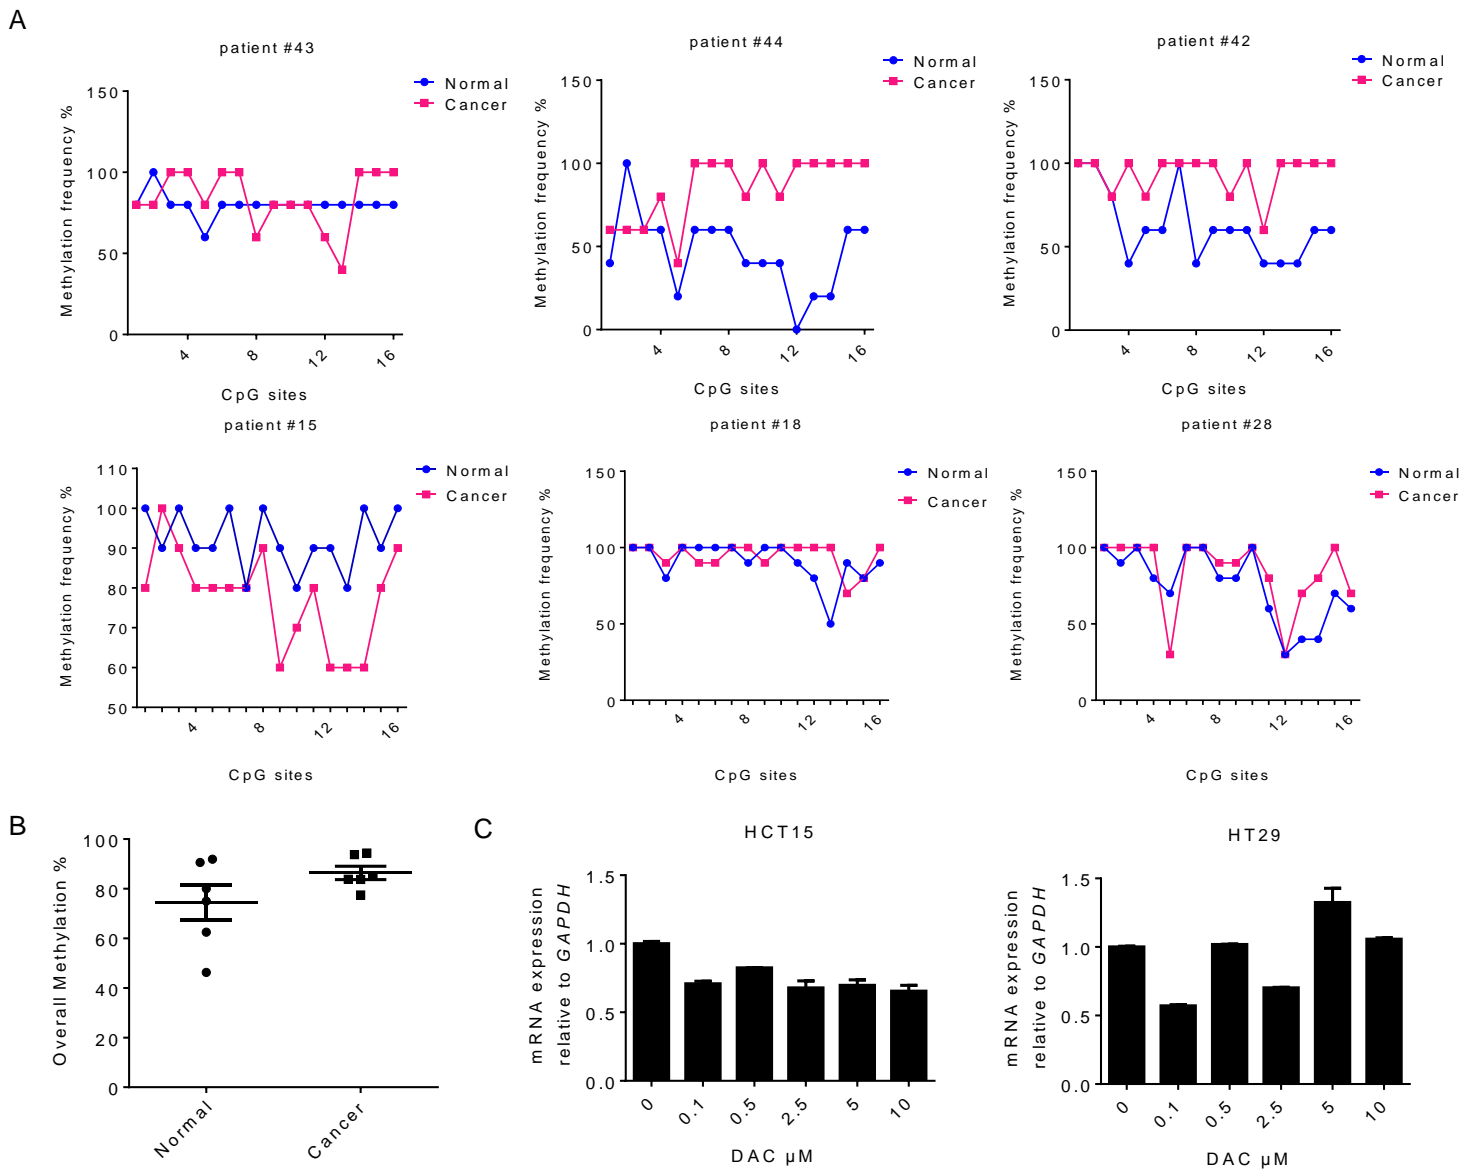

**Figure S4**

DNA methylation has no effect on *CNT2* expression in CRC. (A) Methylation analysis of *CNT2* promoter in human CRC tumors compared with paired adjacent normal tissues. Methylation frequency of each CpG site indicates the proportion of methylated CpG from 5 sequenced clones for patient #42, #43, #44 and 10 sequenced clones for patient #15, #18, #28. X axis represents individual CpG site 1-16. Sample number is shown at the top of each graph. (B) Overall methylation frequency in adjacent normal and cancerous CRC samples from (A), two-tailed paired *t* test was used to evaluate the difference in methylation frequency between normal and cancerous samples. (C) The expression of *CNT2* normalized to *GAPDH* in HCT15 and HT29 after treated with DAC for 72 h.

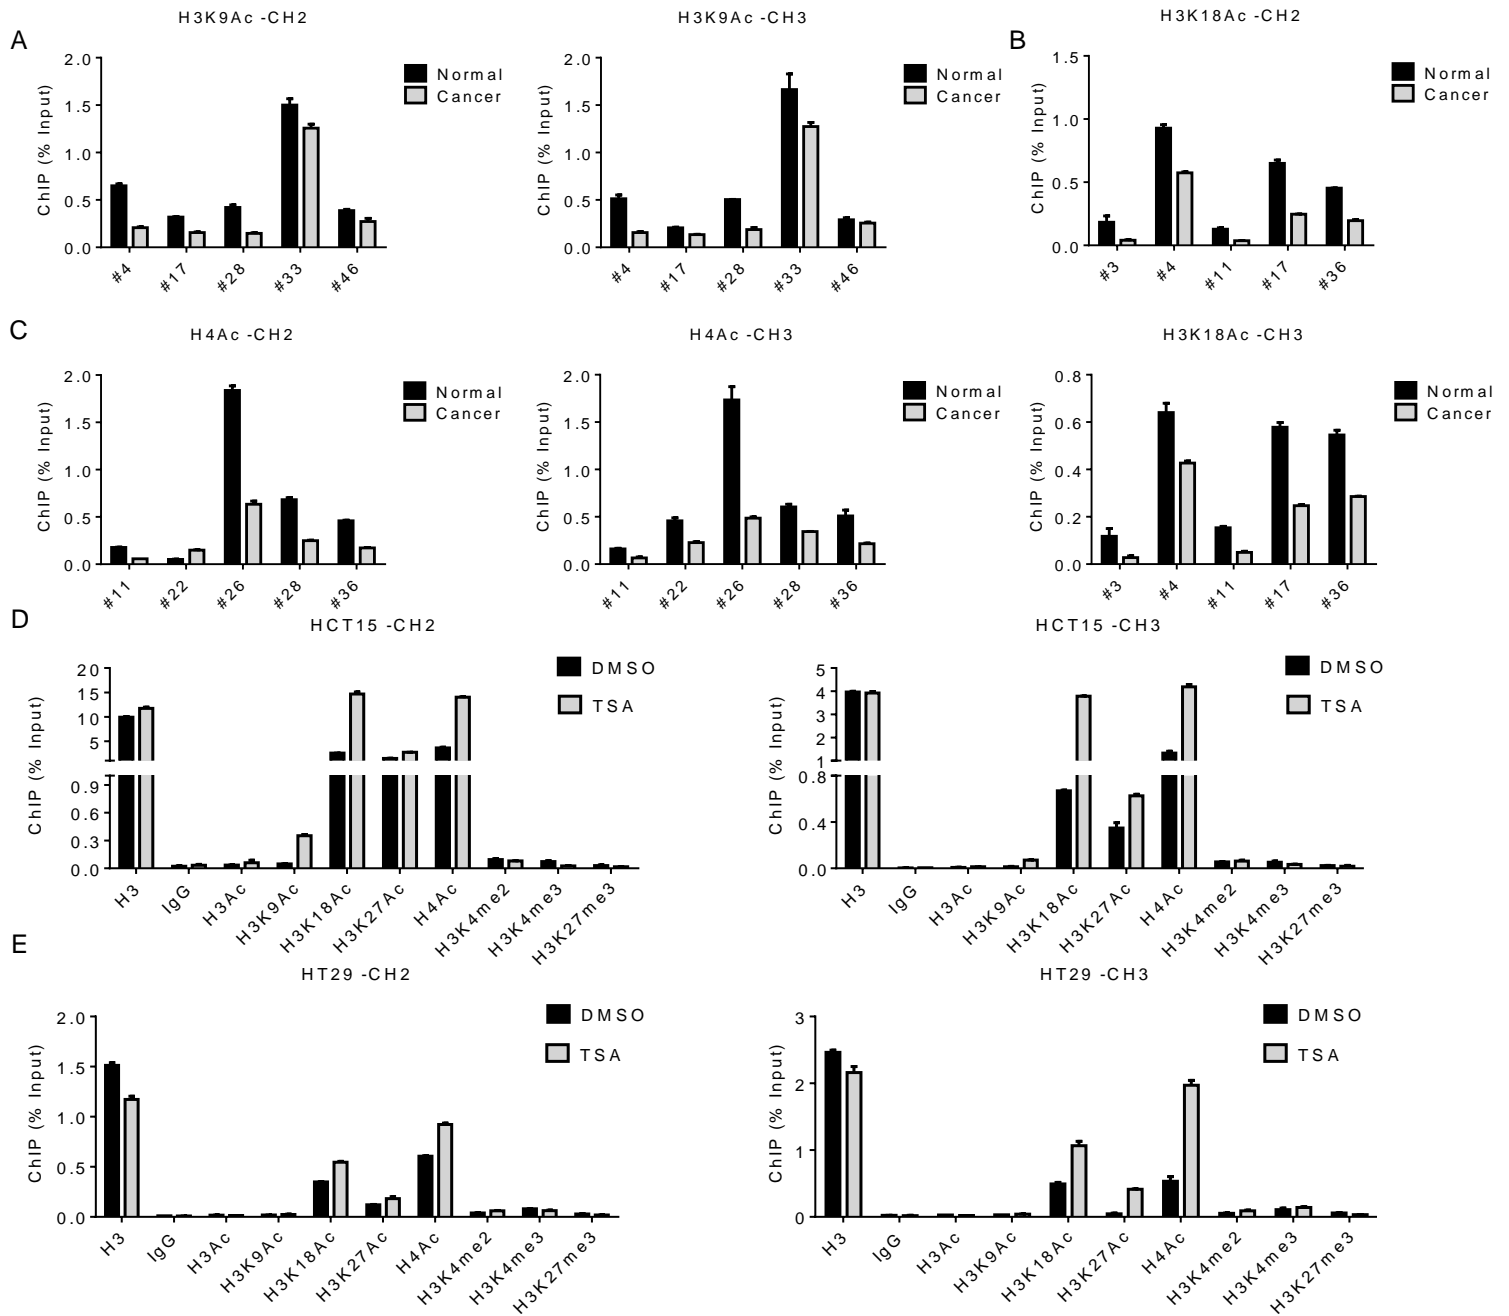

**Figure S5**

Histone hypoacetylation represses *CNT2* in CRC. (A) ChIP-qPCR analysis of H3K9Ac in *CNT2* promoter region in human CRC tumors compared with paired adjacent normal tissues, bar plots, mean  $\pm$  SEM. CH2, CH3 represents different primers that cover different part of *CNT2* promoter region. (B) ChIP-qPCR analysis of H3K18Ac in *CNT2* promoter region in human CRC tumors compared with paired adjacent normal tissues, bar plots, mean  $\pm$  SEM. CH2, CH3 represents different primers that cover different part of *CNT2* promoter region. (C) ChIP-qPCR analysis of H4Ac in *CNT2* promoter region in human CRC tumors compared with paired adjacent normal tissues, bar plots, mean  $\pm$  SEM. CH2, CH3 represents different primers that cover different part of *CNT2* promoter region. (D) 1  $\mu$ M TSA treatment in CRC cell line HCT15 reorganized histone modification profile at *CNT2* promoter region. (E) 1  $\mu$ M TSA treatment in CRC cell line HT29 reorganized histone modification profile at *CNT2* promoter region.



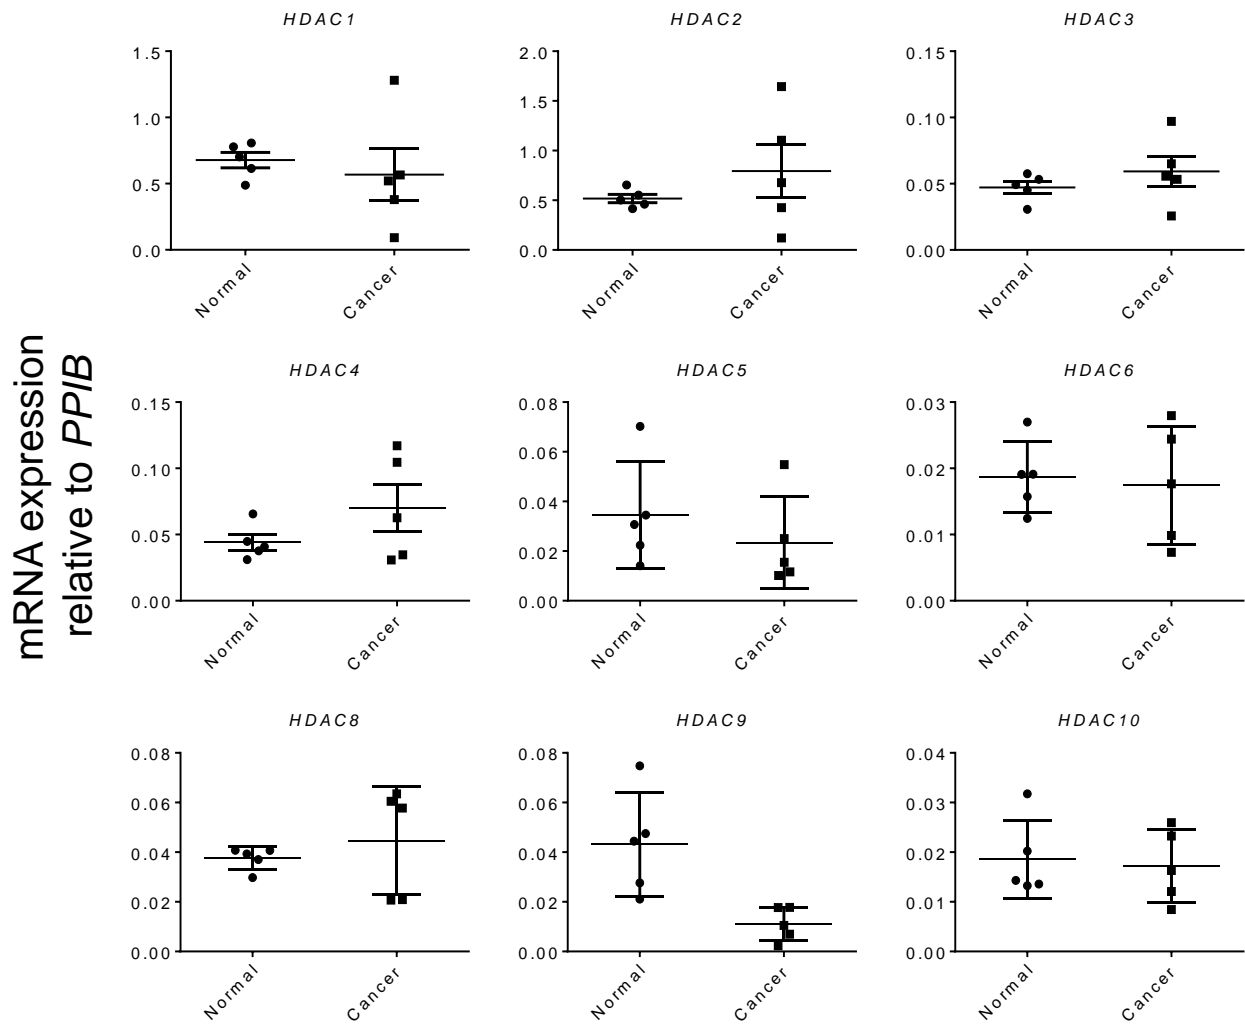

**Figure S6**

HDACs expression in matched CRC tissues and adjacent normal tissues (n=5). Results are expressed as mean  $\pm$  SEM. Two-tailed paired *t* test was used for the analysis.

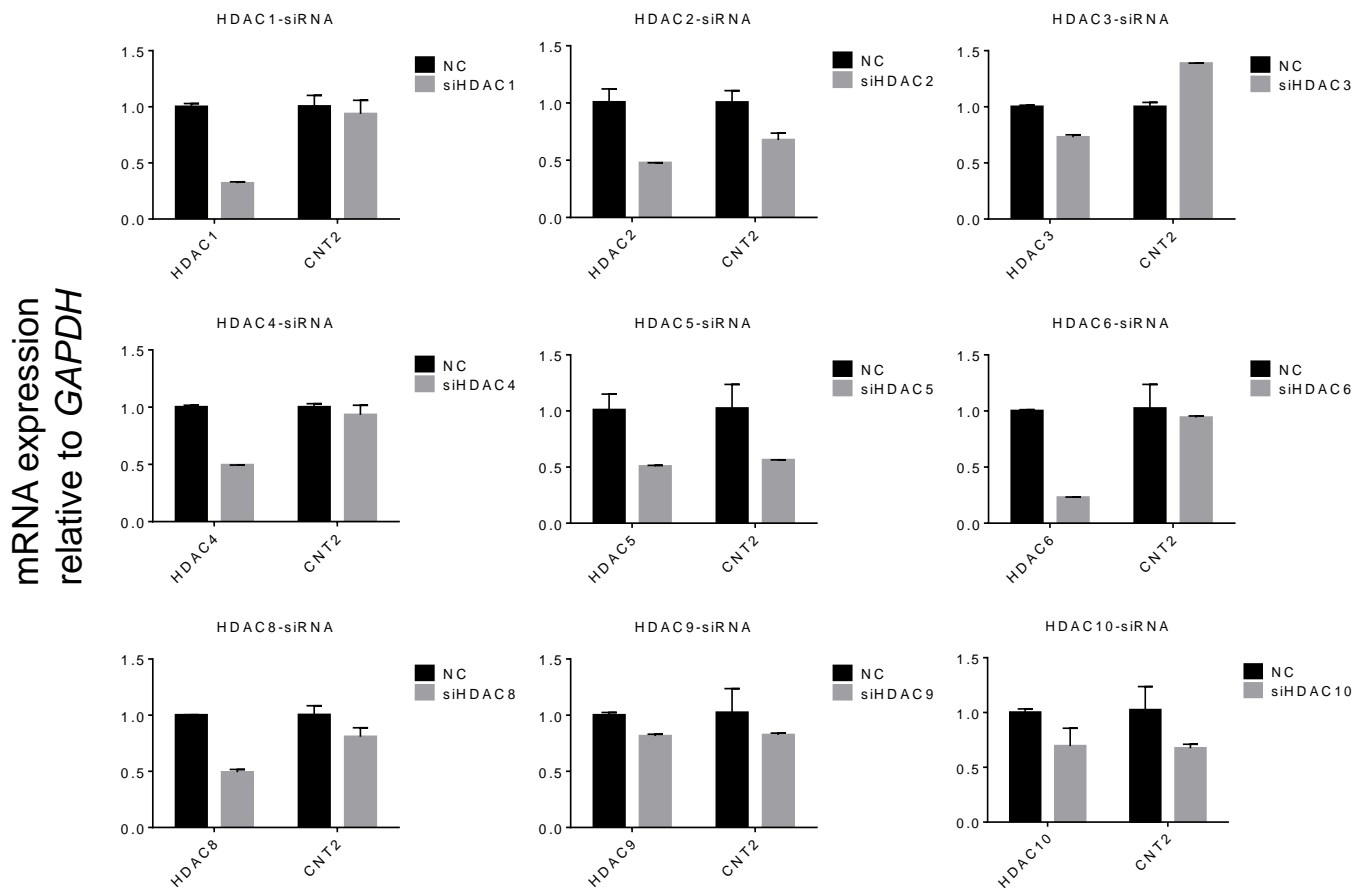

**Figure S7**

The expression of *CNT2* and HDACs after transfected with various siRNAs in HCT15. NC, cells transfected with negative control siRNA.

mRNA expression  
relative to GAPDH

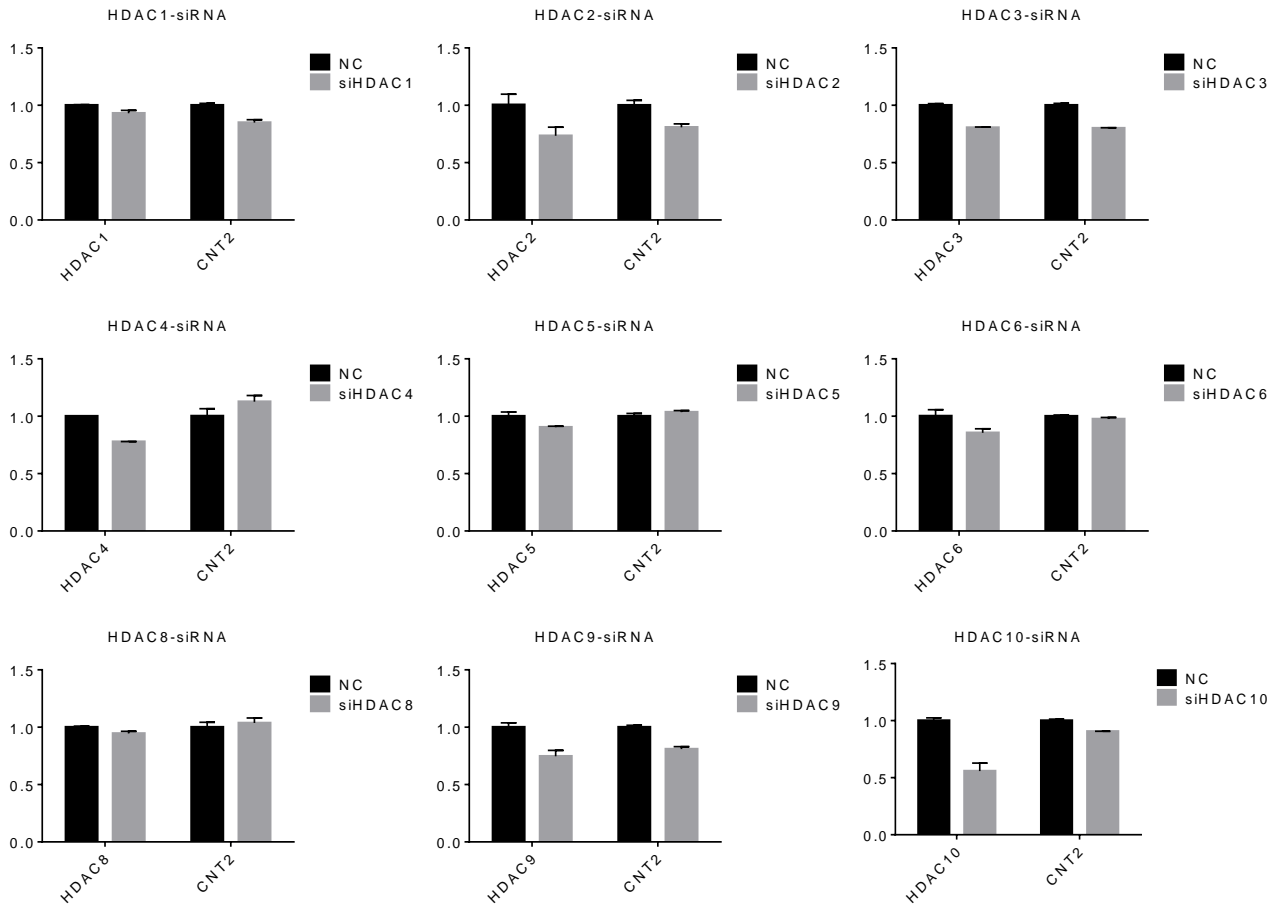

**Figure S8**

The expression of *CNT2* and HDACs after transfected with various siRNAs in HT29. NC, cells transfected with negative control siRNA.
